# Supplementary material for: Semi-Rolled Leaf2 modulates rice leaf rolling by regulating abaxial side cell differentiation
Source: PubMed Central journal article supplement (PMC4809286; doi:10.1093/jxb/erw029), 2016-02-11
Supplement: supp_erw029_supplementary_figures_S1_S7_Tables_S1_S9.pdf [file supp_erw029_supplementary_figures_S1_S7_Tables_S1_S9.pdf]

## Supplementary Data

### Supplementary Fig. S1

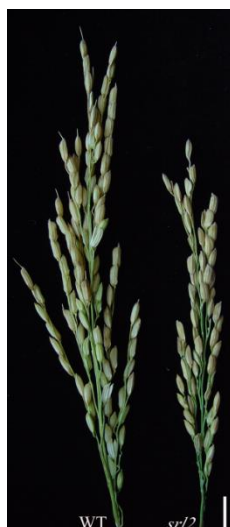

**Supplementary Fig. S1.** Morphological comparison of wild-type and *srl2* panicles. Scale bars = 1 cm.

### Supplementary Fig. S2

|             |                                                                                                                                                                                                         |     |
|-------------|---------------------------------------------------------------------------------------------------------------------------------------------------------------------------------------------------------|-----|
| SRL2-WT     | MGFMSAKLFPSCESMVCVCPALRPSSRRPVKRYKLLAEI FPKT PDGLPNERKI MKLCEYAAKNPLRI PKI AKFLECRSHKELRS AHVNF I KI I TEAYSK                                                                                           | 100 |
| SRL2-mutant | MGFMSAKLFPSCESMVCVCPALRPSSRRPVKRYKLLAEI FPKT PDGLPNERKI MKLCEYAAKNPLRI PKI AKFLECRSHKELRS AHVNF I KI I TEAYSK                                                                                           | 100 |
| Consensus   | ngf ns ak l f p s c e s m v c v c p a l r p s s r r p v k r y k l l a e i f p k t p d g l p n e r k i m k l c e y a a k n p l r i p k i a k f l e c r s h k e l r s a h v n f i k i i t e a y s k       |     |
| SRL2-WT     | LLFI CKEQVAFYAI SLVNVLT ELLLESKQENI HILGCOTLAKFI YSOVDNTYARNI ESLVRKVCVLSRQOGVEHSLRAASLQCLSAMVFMKEHSYI FVD                                                                                              | 200 |
| SRL2-mutant | LLFI CKEQVAFYAI SLVNVLT ELLLESKQENI HILGCOTLAKFI YSOVDNTYARNI ESLVRKVCVLSRQOGVEHSLRAASLQCLSAMVFMKEHSYI FVD                                                                                              | 200 |
| Consensus   | l l f i c k e q v a f y a i s l v n v l t e l l e s k q e n i h i l g c o t l a k f i y s o v d n t y a r n i e s l v r k v c v l s r q o g v e h s l r a a s l q c l s a m v f m k e h s y i f v d     |     |
| SRL2-WT     | FDEI VCSVLENYRVEES AAGDEERHAPQHNVDEI VRREGRAGLGGGNDVNCNSTAI RLRSARDSSAL TREERESPEVVAHI CVQKLAELAKESTTNRRI                                                                                               | 300 |
| SRL2-mutant | FDEI VCSVLENYRVEES AAGDEERHAPQHNVDEI VRREGRAGLGGGNDVNCNSTAI RLRSARDSSAL TREERESPEVVAHI CVQKLAELAKESTTNRRI                                                                                               | 300 |
| Consensus   | f d e i v c s v l e n y r v e e s a a g d e e r h a p q h n v d e i v r r e g r a g l g g g n d v n c n s t a i r l r s a r d s s a l t r e e r e s p e v v a h i c v q k l a e l a k e s t t n r r i   |     |
| SRL2-WT     | LDPMLSYFDKQKQWAPRCGLALVLSDMSYLEKSSGNEQLI LTVSIRHLDHKNVLYDPCI KSDMIQTATLLARQLRSRGI AAELVVAGLDCRHLRKTLEA                                                                                                  | 400 |
| SRL2-mutant | LDPMLSYFDKQKQWAPRCGLALVLSDMSYLEKSSGNEQLI LTVSIRHLDHKNVLYDPCI KSDMIQTATLLARQLRSRGI AAELVVAGLDCRHLRKTLEA                                                                                                  | 400 |
| Consensus   | l d p m l s y f d k k k q w a p r c g l a l v l s d m s y l e k s s g n e q l i l t v s i r h l d h k n v l y d p c i k s d m i q t a t l l a r q l r s r g i a a e l v v a g l d c r h l r k t l e a   |     |
| SRL2-WT     | NESASI EELNLNESLQNFLODCLLEVVTGI NDVRLPYDMVAI TLENLPSNPVVARASI GSLLI LSHI I SLTSM LNAPMLFPEALLQQLKSMVHPDVT                                                                                               | 500 |
| SRL2-mutant | NESASI EELNLNESLQNFLODCLLEVVTGI NDVRLPYDMVAI TLENLPSNPVVARASI GSLLI LSHI I SLTSM LNAPMLFPEALLQQLKSMVHPDVT                                                                                               | 500 |
| Consensus   | n e s a s i e e l n l n e s l q n f l o d c l l e v v t g i n d v r p l y d m v a i t l e n l p s n p v v a r a s i g s l l i l s h i i s l t s m l n a p m l f p e a l l q q l k s m v h p d v t       |     |
| SRL2-WT     | RVGAHHMFSAVI VOGPSRQRS ESDFLYET KKWQSRRTSVFASAT ALLEKL RREKESL GSDKT GNMDDKEKSI SEEENKHVMARKNSAYFSKLVFSFTDR                                                                                             | 600 |
| SRL2-mutant | RVGAHHMFSAVI VOGPSRQRS ESDFLYET KKWQSRRTSVFASAT ALLEKL RREKESL GSDKT GNMDDKEKSI SEEENKHVMARKNSAYFSKLVFSFTDR                                                                                             | 600 |
| Consensus   | r v g a h h m f s a v i v o g p s r q r s e s d f l y e t k k w q s r t t s v f a s a t a l l e k l r r e k e s l g s d k t g n m d d e k e k s i s e e e n k h v m a r k n s a y f s k l v f s f t d r |     |
| SRL2-WT     | YAALTSAAEEANI VMLTEDQKNQLLSAFVWQAI QTDNTPFNYEAI GHSYSLTVI SSRDKSRNSNNI QFFCLPLSLRSVSLTNGVLSPCSQRSI FTLAT                                                                                                | 700 |
| SRL2-mutant | YAALTSAAEEANI VMLTEDQKNQLLSAFVWQAI QTDNTPFNYEAI GHSYSLTVI SSRDKSRNSNNI QFFCLPLSLRSVSLTNGVLSPCSQRSI FTLAT                                                                                                | 700 |
| Consensus   | y a a l t s a a e e a n i v m l t e d q k n q l l s a f v w q a i q t d n t p f n y e a i g h s y s l t v i s s r l k d s r n s n n i q f f c l p l s l r s v s l t n g v l s p s c q r s i f t l a t   |     |
| SRL2-WT     | SMLAFAGRVCHI TELFDVLRGFTSCNMDPYLRI GEDLQLYVRLQSDLNGYGS CS DQEI ARSVLSDCRTKVGI NDQRVL DVVACALCNLT EMDKDLVVKEL                                                                                            | 800 |
| SRL2-mutant | SMLALLGKS...VTLLNCLMC                                                                                                                                                                                   | 818 |
| Consensus   | s m l a f a g r v c h i t e l f d v l r g f t s c n m d p y l r i g e d l q l y v r l q s d l n g y g s c s d q e i a r s v l s d c r t k v g i n d q r v l d v v a c a l c n l t e m d k d l v v k e l |     |
| SRL2-WT     | TENFTPEEVPLFGSNSAFDWFNFVQAFSDESLSFDEECRSRTSVDGGLHESPI TNTGSSI SKTTMPQSVPRVLGVCQLLESALHVAGCVAGASVSTSL                                                                                                    | 900 |
| SRL2-mutant | .....                                                                                                                                                                                                   | 918 |
| Consensus   | t e n f t p e e v p l f g s n s a f d w f n f v q a f s d e s l s f d e e c r s r t s v d g g l h e s p i t n t g s s i s k t t m p q s v p r v l g v c q l l e s a l h v a g c v a g a s v s t s l     |     |
| SRL2-WT     | PYGTMTSQEALGSGTRKKLSSVLVNGHDSTPDNPAPSLPSAQHFI I PKVNSCGFESSI RTTLEPCS AVKLPASPFDNFLKAAYRAQ                                                                                                              | 988 |
| SRL2-mutant | .....                                                                                                                                                                                                   | 988 |
| Consensus   | p y g t m t s q e a l g s g t r k k l s s v l v n g h d s t p d n p a p s l p s a q h f i i p k v n s c g f e s s i r t t l e p c s a v k l p a s p f d n f l k a a y r a q                             |     |

**Supplementary Fig. S2.** Deduced amino acid sequences of SRL2 and the changes in amino acids caused by mutations.

**Supplementary Fig. S3**

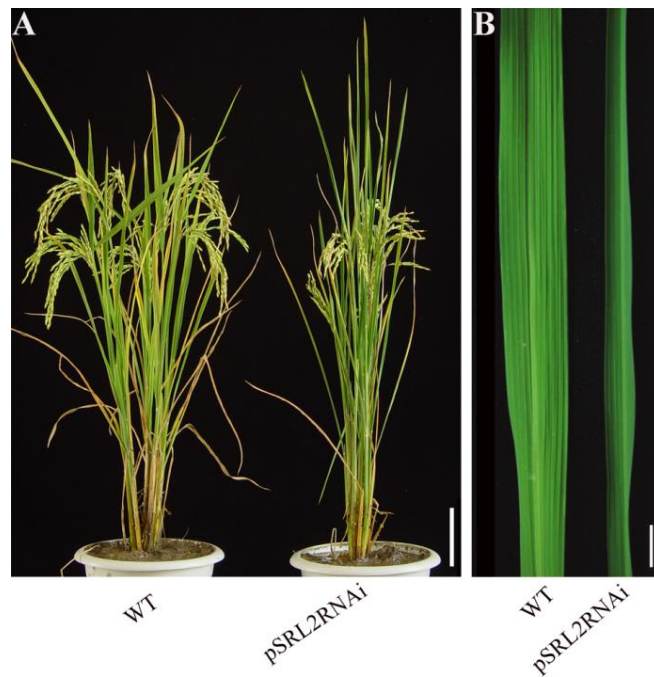

**Supplementary Fig. S3.** RNAi analyses. Scale bars = 10 cm (A) and 1 cm (B).

**Supplementary Fig. S4**

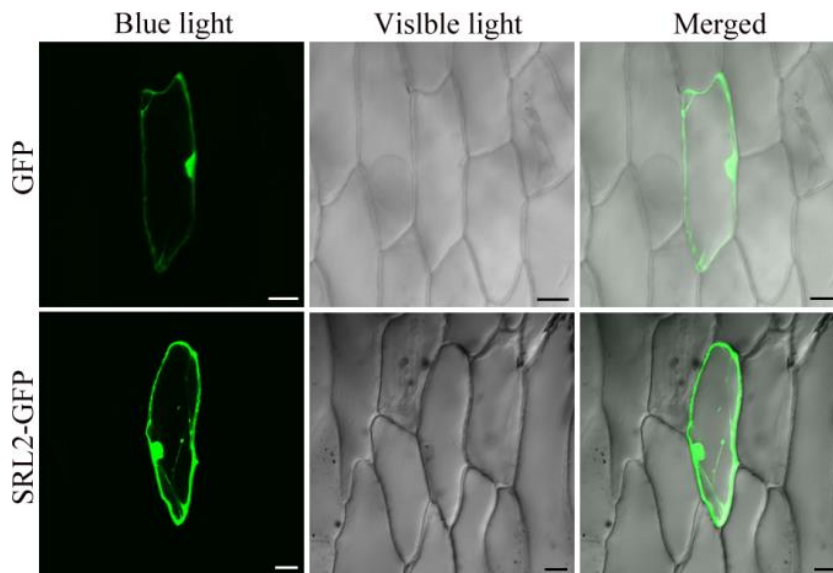

**Supplementary Fig. S4.** Subcellular location of the SRL2-GFP fusion protein in onion epidermal cells. Onion epidermal cell expressing free GFP showed fluorescence in the nucleus and cytoplasm. Onion epidermal cell expressing SRL2-GFP showed fluorescence in the nucleus and cytoplasm. Scale bars = 50  $\mu\text{m}$ .

**Supplementary Fig. S5**

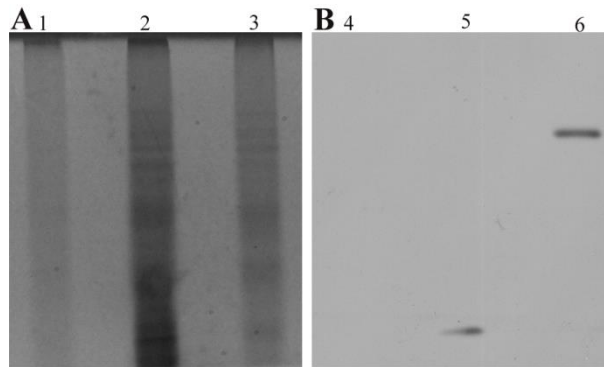

**Supplementary Fig. S5.** Western blot assays. (A) An SDS-PAGE gel stained with Coomassie Brilliant Blue. (B) Western blotting of the GFP and SRL2-GFP using anti-GFP antibody. Line 1, 4: Total protein from onion epidermis as a negative control; Line 2, 5: Total protein from onion epidermis expressing free GFP; Line 3, 6: Total protein from onion epidermis expressing SRL2-GFP.

**Supplementary Fig. S6**

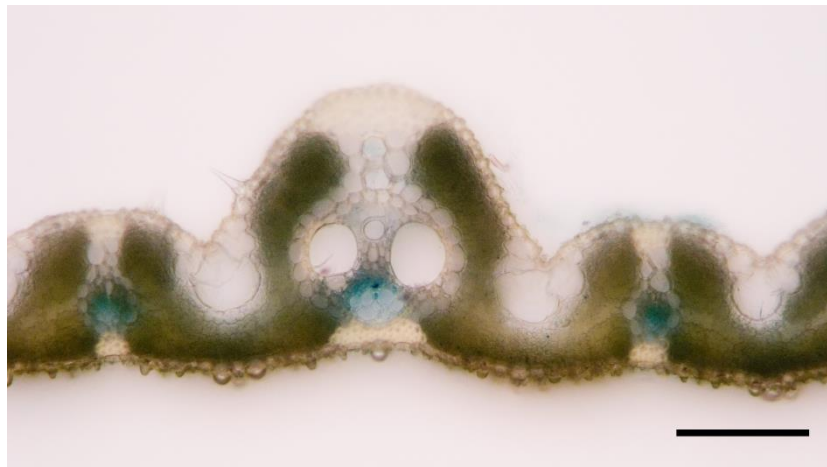

**Supplementary Fig. S6.** Hand-cut section of *ProSRL2-GUS* transgenic rice leaf. Scale bars = 100  $\mu$ m.

**Supplementary Fig. S7**

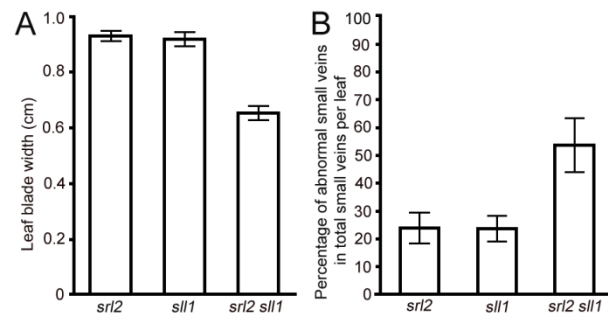

**Supplementary Fig. S7.** Characteristics of the *srl2 sll1* double mutant. (A) The leaf width of leaf blade in *srl2*, *sll1* and *srl2 sll1* double mutant. (B) The percentage of abnormal small veins in *srl2*, *sll1* and *srl2 sll1* double mutant.

**Table S1: Primers used in map-based cloning of *SRL2***

| Marker | Primers                       | Fragment size (bp) |
|--------|-------------------------------|--------------------|
| S1     | F 5'-TGTATGAAGAGGAGTGGAGC-3'  | 100/115            |
|        | R 5'-GGTTAATTGGTTTGGTTGGC-3'  |                    |
| S2     | F 5'-CTCCAATTGGTGGGTATG-3'    | 120/100            |
|        | R 5'-ACTTAACACCATTACCCTGC-3'  |                    |
| S3     | F 5'-CGAAACCTCGTCAGTTCGAG-3'  | 130/115            |
|        | R 5'-TTGGAGGGCAATACGGGGAT-3'  |                    |
| S4     | F 5'-AGGAAGGTGCCTCTCTCGA -3'  | 140/120            |
|        | R 5'-CCTGGTTTAGGAGCTTCTCC-3'  |                    |
| S5     | F 5'-CATGAGTATGTCAATGCTGC-3'  | 100/120            |
|        | R 5'-TCTCTTGCTAATATCTAGCC -3' |                    |
| S6     | F 5'-TACGGTTGCACGGTCAAAGA -3' | 100/120            |
|        | R 5'-TCGTGTGCATCAAGTTGAGG-3'  |                    |

**Table S2: Primers used for in situ hybridization analysis**

| Primer name | Primer pairs         |
|-------------|----------------------|
| SRL2 T7     | GAAGCTCTCAAGCTGGCTTG |
| SRL2 sp6    | CAATATGGTCATACATGGTC |

**Table S3: Primers used in real-time qRT-PCR analysis**

| Gene          | Primer pairs                                          |
|---------------|-------------------------------------------------------|
| <i>SRL2</i>   | TCCATCTGCGCAGCATTTC<br>CTACTGGGCACGATATGCAG           |
| <i>YABBY1</i> | TGGTGAATGTGCCAAACAAT<br>GCTTGGTGAAAAGGAGCAAG          |
| <i>YABBY2</i> | AATTTTCGCGGTCAGTGTT<br>AGTTTTTCGCGGAAGCTCATA          |
| <i>YABBY3</i> | ATCAAGGACGAAATCCAACG<br>GGCATCAGTCCAAAGTGGAT          |
| <i>YABBY4</i> | ATCACATCAAAGGGGACCAA<br>CGAGTACGCAATGGCCTTAT          |
| <i>YABBY5</i> | GAGCCTAATGACCGAACAGG<br>CTCTGCCGCTTCTCTGAAGT          |
| <i>YABBY6</i> | TCTGTTCATCACTGGCTTCG<br>CGTGTTGCAGAAGTTGCAGT          |
| <i>YABBY7</i> | CACAGCTGCTAAAACTGGG<br>CTGGACAGCTACAACCTGGA           |
| <i>Ub</i>     | GTCTGATCTTCGCTGGCAAGCAGC<br>GCATACTGCTGTCCCACAGGAACTG |

**Table S4: The width of leaf blade in both wild type and *srl2* (mm)**

|    | WT               |                 | <i>srl2</i>      |                 |
|----|------------------|-----------------|------------------|-----------------|
|    | before stretched | after stretched | before stretched | after stretched |
| 1  | 11               | 11.8            | 6                | 8               |
| 2  | 11.5             | 12              | 4                | 8               |
| 3  | 12               | 12              | 6                | 8.5             |
| 4  | 13               | 13              | 6                | 9               |
| 5  | 12.5             | 12.5            | 4                | 7               |
| 6  | 12               | 12              | 6                | 9               |
| 7  | 12               | 12              | 5.5              | 8               |
| 8  | 12               | 12              | 6                | 8               |
| 9  | 12.5             | 13              | 4                | 8.2             |
| 10 | 12               | 12              | 4                | 8               |
| 11 | 13               | 13              | 5                | 8               |
| 12 | 11.5             | 11.5            | 5                | 8.5             |
| 13 | 12.5             | 13              | 5                | 8               |
| 14 | 12               | 12.8            | 4                | 8               |
| 15 | 12               | 12              | 3.5              | 7               |
| 16 | 13               | 14              | 5                | 9               |
| 17 | 11.8             | 12              | 5                | 8.5             |
| 18 | 14               | 14              | 5                | 9               |
| 19 | 12.5             | 13              | 5                | 8               |
| 20 | 11.5             | 12.5            | 5                | 8               |
| 21 | 11               | 12              | 5                | 8               |
| 22 | 12               | 13              | 4                | 7               |
| 23 | 13               | 13              | 3                | 8               |
| 24 | 11               | 11.5            | 4                | 8               |
| 25 | 12               | 12.5            | 4                | 7.5             |
| 26 | 12               | 13              | 4                | 7               |
| 27 | 12.5             | 13.5            | 5                | 8.5             |
| 28 | 12               | 13              | 5                | 8               |
| 29 | 11.5             | 12              | 5                | 8.5             |

1-29: different rice plants.

**Table S5: The height of plants in both wild type and *srl2* (cm)**

|             | 1    | 2    | 3    | 4    | 5    | 6    | 7    | 8    | 9    | 10   |
|-------------|------|------|------|------|------|------|------|------|------|------|
| WT          | 78.2 | 79.5 | 81.3 | 78.6 | 78.4 | 81.2 | 78.1 | 79.2 | 82.1 | 79.2 |
| <i>srl2</i> | 56.1 | 55.2 | 57.2 | 54.3 | 56.5 | 56.7 | 57.4 | 55.1 | 55.2 | 54.3 |

1-10: different rice plants.

**Table S6: The length of internode in both wild type and *srl2* (cm)**

|    | WT   |      |     |     |     | <i>srl2</i> |     |     |     |     |
|----|------|------|-----|-----|-----|-------------|-----|-----|-----|-----|
|    | I    | II   | III | IV  | V   | I           | II  | III | IV  | V   |
| 1  | 27.7 | 12.8 | 8.5 | 6.7 | 2.2 | 17.8        | 7.5 | 4.1 | 2.5 | 1.5 |
| 2  | 27   | 12   | 8.2 | 6.8 | 2.1 | 19          | 7   | 4   | 3.1 | 1.3 |
| 3  | 27.6 | 13   | 8.5 | 6.4 | 2.4 | 17.5        | 7   | 4.2 | 3   | 1.2 |
| 4  | 26.1 | 11   | 7.2 | 5.8 | 2.3 | 16.5        | 7.2 | 4   | 3   | 1.2 |
| 5  | 26.8 | 12   | 8.8 | 6   | 2.2 | 17          | 8   | 3.8 | 2.5 | 1.1 |
| 6  | 27.5 | 12.1 | 8.1 | 6.5 | 1.8 | 20          | 8.5 | 5.5 | 3.5 | 1.5 |
| 7  | 27   | 13.2 | 8.5 | 6.5 | 2.2 | 18          | 8   | 5.6 | 2.5 | 1.1 |
| 8  | 28.5 | 13.2 | 8.5 | 6.2 | 2.4 | 17.5        | 7.2 | 4.2 | 2   | 0.9 |
| 9  | 26.8 | 12.5 | 7.2 | 6.4 | 2.5 | 18          | 7.8 | 3   | 1.5 | 1.2 |
| 10 | 28.5 | 12.4 | 7.8 | 6.5 | 2.5 | 17.5        | 7.2 | 5.5 | 3.5 | 0.9 |

1-10: different rice plants. I-V: the 1<sup>st</sup> to 5<sup>th</sup> internodes.

**Table S7: The number of abnormal small vascular bundles in *srl2***

|   | No. of abnormal SV | No. of normal SV | No. of total SV |
|---|--------------------|------------------|-----------------|
| A | 5                  | 17               | 22              |
| B | 5                  | 23               | 28              |
| C | 5                  | 18               | 23              |
| D | 6                  | 22               | 28              |
| E | 5                  | 18               | 23              |
| F | 5                  | 23               | 28              |
| G | 5                  | 21               | 26              |

A-G: different rice plants. SV: small vascular bundles

**Table S8: The number of cell in each internode in both wild type and *srl2***

|   | WT   |      |      |      |     | <i>srl2</i> |      |      |     |     |
|---|------|------|------|------|-----|-------------|------|------|-----|-----|
|   | I    | II   | III  | IV   | V   | I           | II   | III  | IV  | V   |
| 1 | 3523 | 1991 | 1545 | 924  | 560 | 2591        | 1385 | 1045 | 555 | 240 |
| 2 | 3796 | 1845 | 1436 | 899  | 768 | 2456        | 1503 | 1080 | 600 | 280 |
| 3 | 3633 | 1874 | 1508 | 927  | 731 | 2501        | 1488 | 1150 | 515 | 300 |
| 4 | 3881 | 2008 | 1568 | 1001 | 677 | 2602        | 1550 | 1050 | 650 | 326 |

1-4: different rice plants. I-V: the 1<sup>st</sup> to 5<sup>th</sup> internodes.

**Table S9: The number of large vascular bundles and small vascular bundles in both wild type and *srl2***

|   | WT        |           | <i>srl2</i> |           |
|---|-----------|-----------|-------------|-----------|
|   | No. of LV | No. of SV | No. of LV   | No. of SV |
| 1 | 12        | 38        | 10          | 22        |
| 2 | 11        | 33        | 10          | 28        |
| 3 | 12        | 34        | 9           | 23        |
| 4 | 11        | 34        | 10          | 28        |
| 5 | 11        | 33        | 10          | 23        |
| 6 | 11        | 28        | 10          | 28        |

1-6: different rice plants; LV: large vascular bundles; SV: small vascular bundles.
